# Supplementary material for: The Role of Immunotherapy in the First-Line Treatment of Elderly Advanced Non-Small Cell Lung Cancer
Source: MDPI journal article supplement (doi:10.3390/cancers15082319), 2023-04-15
Supplement: s1 [file s1]

# The role of immunotherapy in the first-line treatment of elderly advanced non-small cell lung cancer

Alessia Spagnuolo and Cesare Gridelli

**Table S1.** A. The KEYNOTE-010, KEYNOTE-024 and KEYNOTE-042 pooled analysis: overall survival following treatment with pembrolizumab or chemotherapy by patient age ( $\geq 75$  or  $< 75$  years) in the population with PD-L1 TPS  $\geq 1\%$  or  $\geq 50\%$  (a) and in an analysis of patients from each individual trial (b). B. FDA pooled analysis of randomized controlled trials with anti-PD-(L)1 combined with chemotherapy versus immunotherapy alone for first-line treatment of advanced NSCLC with PD-L1 score 1-49%.

| 1A                                        |  |                                        |                      |                    |
|-------------------------------------------|--|----------------------------------------|----------------------|--------------------|
| a                                         |  | Overall survival by age<br>HR (95% CI) |                      |                    |
| PD-L1 TPS ≥1%<br>PD-L1 TPS ≥50%           |  | Patients ≥ 75 years                    | Patients < 75 years  |                    |
|                                           |  | 0.76 (0.56-1.02)                       | 0.76 (0.69-0.84)     |                    |
|                                           |  | 0.40 (0.25-0.64)                       | 0.67 (0.57-0.78)     |                    |
| b                                         |  | Overall survival by age<br>HR (95% CI) |                      |                    |
| KEYNOTE-010<br>KEYNOTE-024<br>KEYNOTE-042 |  | Patients ≥ 75 years                    | Patients < 75 years  |                    |
|                                           |  | 0.72 (0.43-1.21)                       | 0.64 (0.55-0.75)     |                    |
|                                           |  | 0.49 (0.17-1.39)                       | 0.64 (0.42-0.97)     |                    |
|                                           |  | 0.89 (0.59-1.35)                       | 0.79 (0.68-0.92)     |                    |
| 1B                                        |  |                                        |                      |                    |
|                                           |  | Overall survival by age<br>HR (95% CI) |                      |                    |
|                                           |  | Patients <65 years                     | Patients 65-74 years | Patients ≥75 years |
|                                           |  | 0.63 (0.43-0.92)                       | 0.61 (0.38-0.97)     | 0.95 (0.42-2.14)   |

Abbreviations. CI: confidence interval; HR: hazard ratio; PD-L1 TPS: programmed death-ligand 1 tumor proportion score

**Table S2.** Overall survival by age of patients in randomized phase III clinical trials with mono-immunotherapy for advanced stage NSCLC.

| Study          | Treatment line | PD-L1 expression      | Intervention/arms                            | Overall survival by age<br>HR (95% CI)                                                                   |
|----------------|----------------|-----------------------|----------------------------------------------|----------------------------------------------------------------------------------------------------------|
| KEYNOTE-024    | First-line     | PD-L1 $\geq 50\%$     | Pembrolizumab vs platinum-based chemotherapy | $< 65$ : 0.60 (0.38-0.96)<br>$\geq 65$ : 0.64 (0.42-0.98)                                                |
| KEYNOTE-042    | First-line     | PD-L1 $\geq 1\%$      | Pembrolizumab vs platinum-based chemotherapy | $< 65$ : 0.81 (0.67-0.98)<br>$\geq 65$ : 0.82 (0.66-1.01)                                                |
| IMpower 110    | First-line     | PD-L1 $\geq 1\%$      | Atezolizumab vs platinum-based chemotherapy  | $< 65$ : 0.59 (0.34-1.04)<br>65-74: 0.63 (0.34-1.19)<br>$\geq 75$ : 0.79 (0.18-3.56)                     |
| IPSOS          | First-line     | Stratification factor | Atezolizumab vs vinorelbine or gemcitabine   | 0.78 (0.63-0.97)<br>$< 70$ : 0.75 (0.49-1.14)<br>70-79: 0.68 (0.49-0.94)<br>$\geq 80$ : 0.97 (0.66-1.44) |
| EMPOWER-Lung 1 | First-line     | PD-L1 $\geq 50\%$     | Cemiplimab vs platinum-based chemotherapy    | $< 65$ : 0.66 (0.44-1.00)<br>$\geq 65$ : 0.48 (0.30-0.76)                                                |

Abbreviations. CI: confidence interval; HR: hazard ratio; PD-L1: programmed death-ligand 1.

**Table S3.** Overall survival by age of patients in randomized phase III clinical trials with immunotherapy in combination regimens for advanced stage NSCLC.

| Study          | Treatment line | Intervention/arms                                                                                                          | Overall survival by age<br>HR (95% CI) |
|----------------|----------------|----------------------------------------------------------------------------------------------------------------------------|----------------------------------------|
| KEYNOTE-189    | First-line     | Platinum-based chemotherapy + pembrolizumab or placebo                                                                     | <65: 0.43 (0.31-0.61)                  |
|                |                |                                                                                                                            | ≥65: 0.64 (0.43-0.95)                  |
|                |                |                                                                                                                            | ≥75: 1.54 (0.76-3.14)                  |
| KEYNOTE-407    | First-line     | Platinum-based chemotherapy + pembrolizumab or placebo                                                                     | <65: 0.52 (0.34-0.80)                  |
|                |                |                                                                                                                            | ≥65: 0.74 (0.51-1.62)                  |
|                |                |                                                                                                                            | ≥75: 0.81 (0.43-1.55)                  |
| IMpower 150    | First-line     | Platinum-based chemotherapy and bevacizumab +/- atezolizumab                                                               | <65: 0.83 (0.65-1.04)                  |
|                |                |                                                                                                                            | 65-74: 0.72 (0.54-0.97)                |
|                |                |                                                                                                                            | ≥75: 0.97 (0.58-1.62)                  |
| IMpower 130    | First-line     | Platinum-based chemotherapy +/- atezolizumab                                                                               | <65: 0.79 (0.58-1.08)                  |
|                |                |                                                                                                                            | ≥65: 0.78 (0.58-1.05)                  |
|                |                |                                                                                                                            | 75-84: 0.54 (0.27-1.05)                |
| IMpower 131    | First-line     | Platinum-based chemotherapy +/- atezolizumab                                                                               | <65: 0.89 (0.68-1.15)                  |
|                |                |                                                                                                                            | 65-74: 0.84 (0.63-1.13)                |
|                |                |                                                                                                                            | ≥75: 0.74 (0.45-1.23)                  |
| EMPOWER-Lung 3 | First-line     | Platinum-based chemotherapy + cemiplimab or placebo                                                                        | <65: 0.57 (0.40-0.81)                  |
|                |                |                                                                                                                            | ≥65: 0.88 (0.56-1.37)                  |
| CheckMate 227  | First-line     | Nivolumab + ipilimumab vs platinum-based chemotherapy                                                                      | PD-L1 ≥1%:                             |
|                |                |                                                                                                                            | <65: 0.70 (0.56-0.89)                  |
|                |                |                                                                                                                            | 65-74: 0.84 (0.65-1.08)                |
|                |                |                                                                                                                            | ≥75: 0.93 (0.58-1.49)                  |
|                |                |                                                                                                                            | PD-L1 <1%:                             |
|                |                |                                                                                                                            | <65: 0.69 (0.51-0.93)                  |
| CheckMate 9LA  | First-line     | Platinum-based chemotherapy + nivolumab + ipilimumab vs platinum-based chemotherapy                                        | <65: 0.61 (0.47-0.80)                  |
|                |                |                                                                                                                            | 65-74: 0.62 (0.46-0.85)                |
|                |                |                                                                                                                            | ≥75: 1.21 (0.69-2.12)                  |
| POSEIDON       | First-line     | Tremelimumab + durvalumab + platinum-based chemotherapy and durvalumab + platinum-based chemotherapy vs chemotherapy alone | <65: 0.79 (0.62-1.00)                  |
|                |                |                                                                                                                            | ≥65: 0.74 (0.58-0.94) and              |
|                |                |                                                                                                                            | <65: 0.86 (0.68-1.10)                  |

Abbreviations. CI: confidence interval; HR: hazard ratio; PD-L1: programmed death-ligand 1.

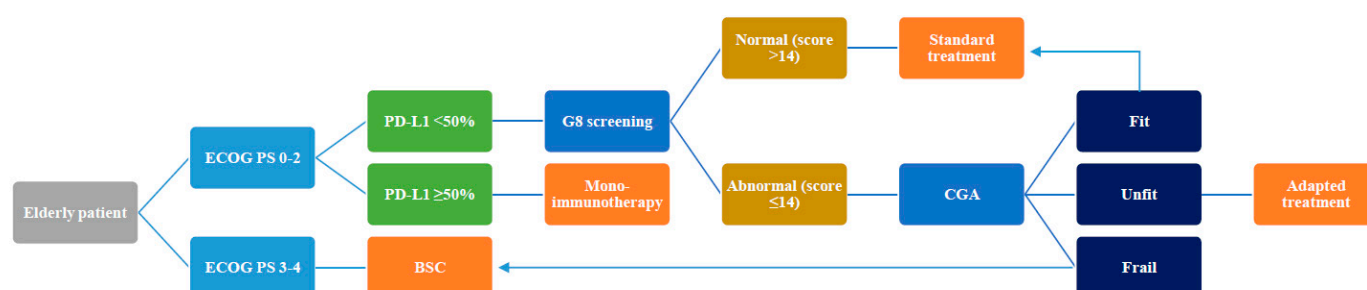**Figure S1.** Therapeutic algorithm for the first-line treatment of elderly advanced NSCLC. Abbreviations: BSC: Best Supportive Care; CGA: Comprehensive Geriatric Assessment; ECOG PS: Eastern Cooperative Oncology Group Performance Status; PD-L1: Programmed death-ligand 1.
